# Supplementary material
Source: publisher figshare collection journal article supplement (https://acs.figshare.com/ndownloader/files/4572001)
Supplement: Supplementary file 1 [file 4572001]

## Supporting Information

# Pseudopolymorph and Infinite Hydrogen Bonding Network of Cyclic Oligomers of *m*-Aminobenzenesulfonic Acid

Kosuke Katagiri, Takako Kato, Hyuma Masu, Masahide Tominaga and Isao Azumaya\*

### Contents

|                                        |     |
|----------------------------------------|-----|
| X-ray Crystallographic Analysis. ----- | 2-5 |
|----------------------------------------|-----|

## X-ray Crystallographic Analysis.

**Crystal data for 1 (Type I).**  $C_{18}H_{15}N_3O_6S_3 \cdot 5H_2O$ ;  $M = 555.59 \text{ g mol}^{-1}$ , colorless prism measuring  $0.20 \times 0.10 \times 0.05 \text{ mm}$ , triclinic,  $P-1$ ,  $a = 8.434(5)$ ,  $b = 12.342(6)$ ,  $c = 12.702(7) \text{ \AA}$ ,  $\alpha = 109.453(6)$ ,  $\beta = 97.697(7)$ ,  $\gamma = 102.720(7)^\circ$ ,  $V = 1184.8(11) \text{ \AA}^3$ ,  $Z = 2$ ,  $D_c = 1.557 \text{ Mg m}^{-3}$ ,  $T = 150 \text{ K}$ ,  $\mu (\text{MoK}\alpha) = 0.377 \text{ mm}^{-1}$ ,  $2\theta_{\text{max}} = 23.82^\circ$ , 4717 reflections, 3506 unique reflections ( $R_{\text{int}} = 0.0706$ ) which were used in all calculations.  $R_1 = 0.1439$ ,  $wR_2 = 0.2193$  (all data)  $R_1 = 0.0805$ ,  $wR_2 = 0.1886$  ( $I > 2\sigma(I)$ ) for 309 parameters. The positions of hydrogen atoms included in the water molecules were not calculated.

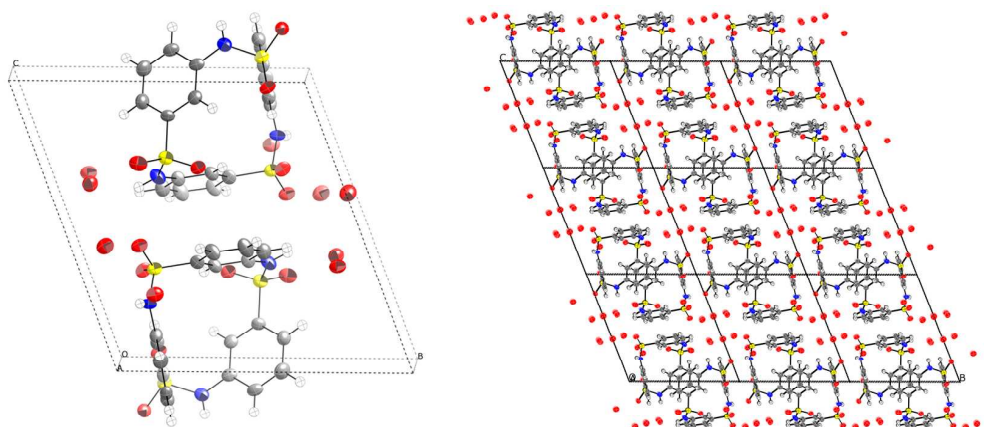

**Figure S1.** ORTEP diagram of unit cell (left) and packing structure (right) in a crystal of **1** (type I).

**Crystal data for 1 (Type II).**  $C_{18}H_{15}N_3O_6S_3 \cdot CH_4O$ ;  $M = 497.55 \text{ g mol}^{-1}$ , colorless prism measuring  $0.50 \times 0.30 \times 0.30 \text{ mm}$ , monoclinic,  $P2_1/n$ ,  $a = 8.430(1)$ ,  $b = 8.9689(1)$ ,  $c = 28.364(4) \text{ \AA}$ ,  $\beta = 91.132(2)^\circ$ ,  $V = 2144.2(6) \text{ \AA}^3$ ,  $Z = 4$ ,  $D_c = 1.541 \text{ Mg m}^{-3}$ ,  $T = 291 \text{ K}$ ,  $\mu(\text{MoK}\alpha) = 0.394 \text{ mm}^{-1}$ ,  $2\theta_{\text{max}} = 27.47^\circ$ , 12454 reflections, 4851 unique reflections ( $R_{\text{int}} = 0.0290$ ) which were used in all calculations.  $R_1 = 0.0557$ ,  $wR_2 = 0.1327$  (all data)  $R_1 = 0.0403$ ,  $wR_2 = 0.11170$  ( $I > 2\sigma(I)$ ) for 303 parameters.

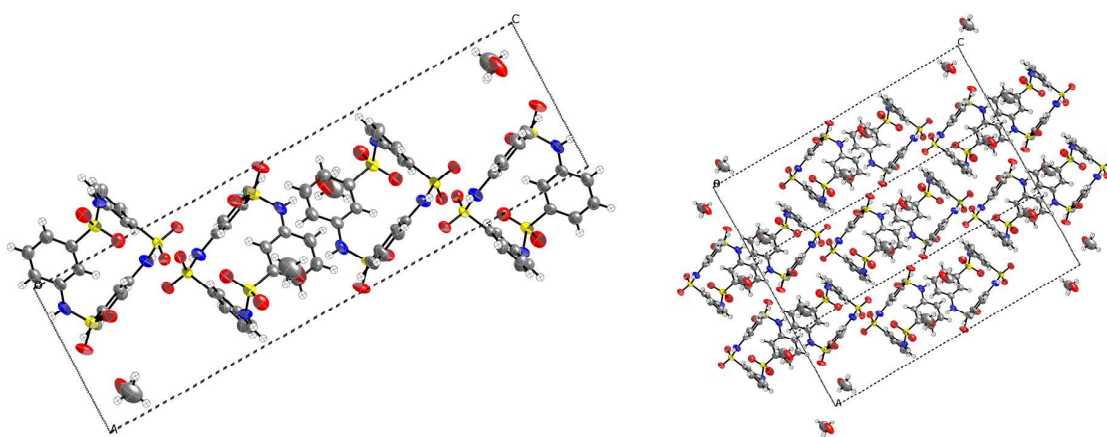

**Figure S2.** ORTEP diagram of unit cell (left) and packing structure (right) in a crystal of **1** (type II).

**Crystal data for 1 (Type III).**  $C_{18}H_{15}N_3O_6S_3 \cdot C_4H_6N_2$ ;  $M = 547.62 \text{ g mol}^{-1}$ , colorless prism measuring  $0.40 \times 0.20 \times 0.10 \text{ mm}$ , triclinic,  $P-1$ ,  $a = 9.949(2)$ ,  $b = 10.949(2)$ ,  $c = 11.940(3) \text{ \AA}$ ,  $\alpha = 81.215(3)$ ,  $\beta = 75.704(3)$ ,  $\gamma = 77.805(7)^\circ$ ,  $V = 1225.0(5) \text{ \AA}^3$ ,  $Z = 2$ ,  $D_c = 1.485 \text{ Mg m}^{-3}$ ,  $T = 150 \text{ K}$ ,  $\mu (\text{MoK}\alpha) = 0.352 \text{ mm}^{-1}$ ,  $2\theta_{\text{max}} = 27.50^\circ$ , 7386 reflections, 5344 unique reflections ( $R_{\text{int}} = 0.0280$ ) which were used in all calculations.  $R_1 = 0.0562$ ,  $wR_2 = 0.1413$  (all data)  $R_1 = 0.0448$ ,  $wR_2 = 0.1299$  ( $I > 2\sigma(I)$ ) for 327 parameters.

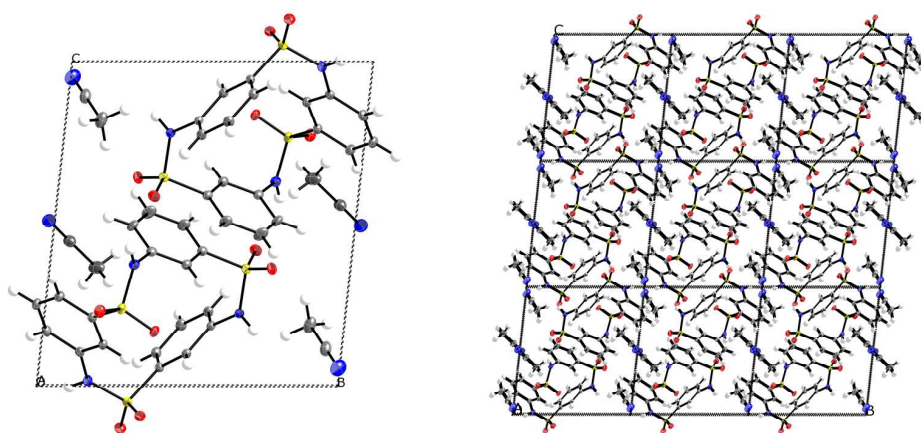

**Figure S3.** ORTEP diagram of unit cell (left) and packing structure (right) in a crystal of **1** (type III).

**Crystal data for 2.**  $\text{C}_{24}\text{H}_{20}\text{N}_4\text{O}_8\text{S}_4$ ;  $M = 620.68 \text{ g mol}^{-1}$ , colorless prism measuring  $0.15 \times 0.10 \times 0.05 \text{ mm}$ , tetragonal,  $I4_1/a$ ,  $a = 15.428(4)$ ,  $b = 15.428(4)$ ,  $c = 21.819(2) \text{ \AA}$ ,  $V = 5193.3(19) \text{ \AA}^3$ ,  $Z = 8$ ,  $D_c = 1.588 \text{ Mg m}^{-3}$ ,  $T = 303 \text{ K}$ ,  $\mu = 0.424 \text{ mm}^{-1}$ ,  $2\theta_{\text{max}} = 23.93^\circ$ , 8033 reflections, 1844 unique ( $R_{\text{int}} = 0.0886$ ),  $R_1 = 0.0901$ ,  $wR_2 = 0.1159$  (all data)  $R_1 = 0.0394$ ,  $wR_2 = 0.0925$  ( $I > 2\sigma(I)$ ) for 181 parameters.

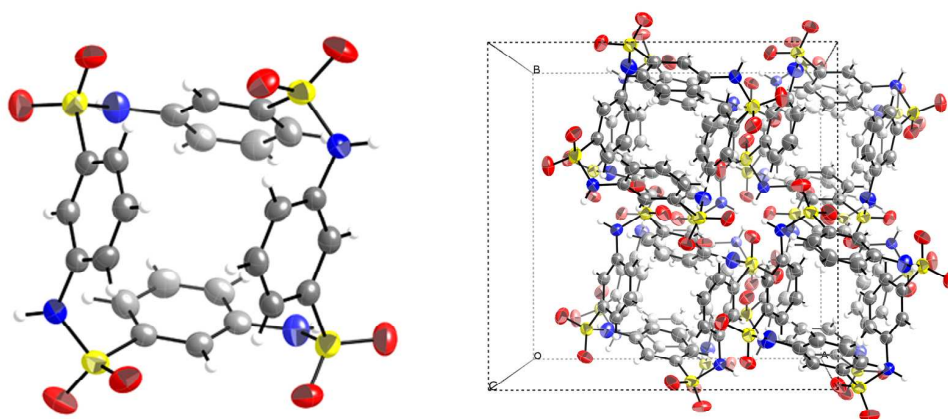

**Figure S4.** ORTEP diagram of asymmetric unit (left) and packing structure (right) in a crystal of **2**.
